# Supplementary material for: Organization of Mn3O4nanoparticles into γ-MnOOHnanowiresvia hydrothermal treatment of the colloids induced by laser ablation in water
Source: Royal Society of Chemistry journal article supplement (doi:10.1039/c004482b), 2010-08-03
Supplement: c004482b.pdf [file c004482b.pdf]

**Electronic Supplementary Information (ESI)**

**Organization of  $\text{Mn}_3\text{O}_4$  Nanoparticles into  $\gamma\text{-MnOOH}$  Nanowires via Hydrothermal Treating the Colloids Induced by Laser Ablation in Water**

Hemin Zhang, Changhao Liang,\* Zhenfei Tian, Guozhong Wang, Weiping Cai

*Key Laboratory of Materials Physics and Anhui Key Laboratory of Nanomaterials and Nanotechnology, Institute of Solid State Physics, Hefei Institutes of Physical Science, Chinese Academy of Sciences, Hefei, 230031, China.*

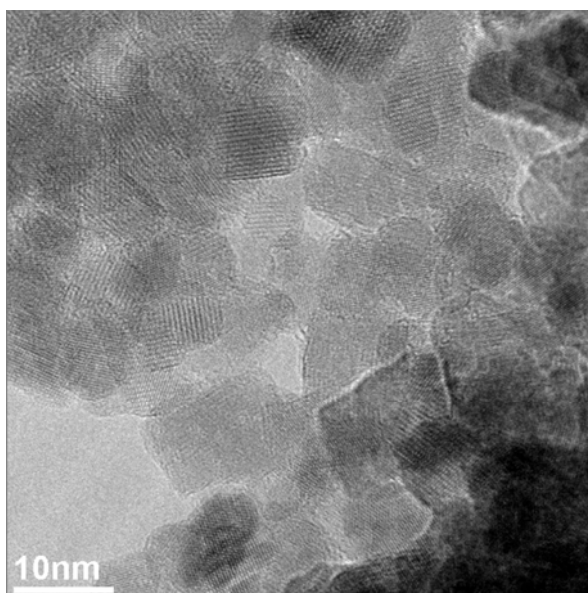

**Fig.S1.** HRTEM image of  $\text{Mn}_3\text{O}_4$  nanoparticles.

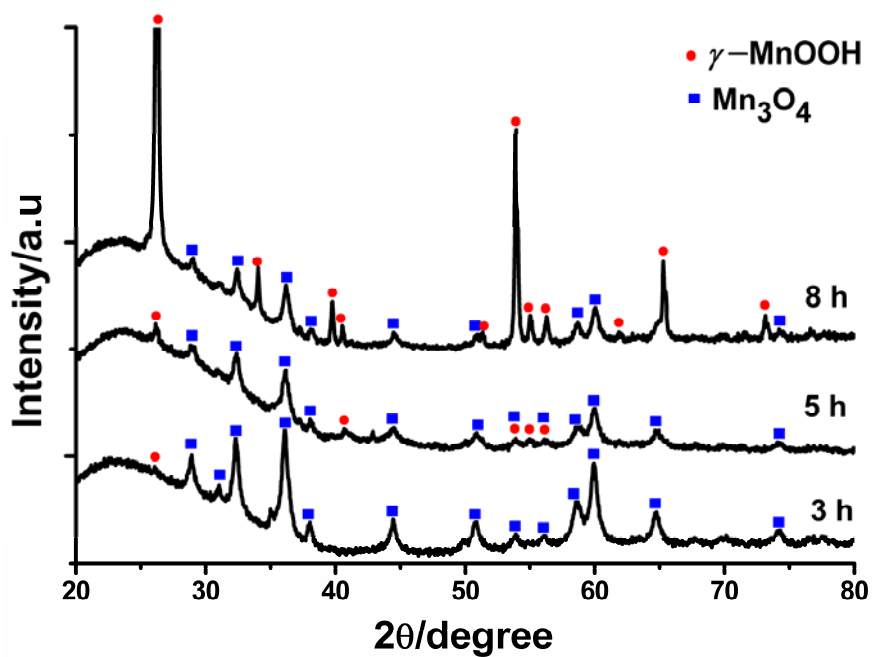

**Fig.S2.** XRD patterns of LAL generated Mn<sub>3</sub>O<sub>4</sub> nanoparticles after hydrothermal treatment at 80 °C with the duration time of 3 h, 5 h and 8 h, respectively.
